# Supplementary material for: Molecular landscape and subtype-specific therapeutic response of nasopharyngeal carcinoma revealed by integrative pharmacogenomics
Source: PubMed Central journal article supplement (PMC8144567; doi:10.1038/s41467-021-23379-3), 2021-05-24
Supplement: 41467_2021_23379_MOESM4_ESM.pdf [file 41467_2021_23379_MOESM4_ESM.pdf]

## Description of Additional Supplementary Files

### **Supplementary Data 1**

**Description:** Detailed clinicopathological characteristics of NPC patients (n=106)

### **Supplementary Data 2**

**Description:** H&E staining images of 47 tumors for bulk sequencing

### **Supplementary Data 3**

**Description:** Somatic mutational events identified by WES in this cohort

### **Supplementary Data 4**

**Description:** Sanger sequencing validation of candidate mutations

### **Supplementary Data 5**

**Description:** 48-drug screening results (42 PDOs)

### **Supplementary Data 6**

**Description:** First-line CRT screening results (20 PDOs)

### **Supplementary Data 7**

**Description:** 48-CRT screening results (8 PDOs)

### **Supplementary Data 8**

**Description:** Gene cohorts with subtype-differentiated expressions

### **Supplementary Data 9**

**Description:** Sanger sequencing validation for CRISPR-Cas9 KO experiment

### **Supplementary Data 10**

**Description:** Formulation of tissue dissociation buffer and organoid culture medium

### **Supplementary Data 11**

**Description:** Summary of sequencing coverages

### **Supplementary Data 12**

**Description:** Drug library used for high-throughput screening (146 drugs)

**Supplementary Data 13**

**Description:** sgRNA oligos used for CRISPR-Cas9 KO experiment
